# Supplementary material for: Effects of (Combined) Chinese Medicine on the Risk of Death From COVID-19: A Retrospective Data Analysis Based on 4567 Patients
Source: Research Square preprint supplement (doi:10.21203/rs.3.rs-464094/v1), 2021-05-05
Supplement: Supplementary file 1 [file dc349e405221819c086da089.docx]

Enclosure

Table 1 Distribution of the time from the onset of disease to the beginning of taking Traditional Chinese medicine in patients with different outcomes

| Outcome | <14 days n(%) | 14-28 days n(%) | 28-42 days n(%) | ≥42 days n(%) | Chi square | P |
| --- | --- | --- | --- | --- | --- | --- |
| Death | 1(0.6) | 7(0.8) | 1(0.1) | 5(1.7) | - | 0.009* |
| Discharge | 161(99.4) | 823(99.2) | 928(99.9) | 284(98.3) |  |  |

*Fisher’s exact probability

Table 2 The actual time distribution of taking Traditional Chinese medicine in patients with different outcomes

| Type | Outcome | <7 days n (%) | 7-14 days n (%) | ≥14 days n (%) | Chi square | P |
| --- | --- | --- | --- | --- | --- | --- |
|  | Death | 7(0.9) | 4(0.6) | 3(0.4) | - | 0.596* |
|  | Discharge | 803(99.1) | 719(99.4) | 674(99.6) |
| Mild | Death | 0 | 0 | 0 | - | - |
|  | Survival | 13 | 4 | 6 |  |  |
| Common | Death | 1(0.2) | 0 | 2(0.5) |  | 0.278* |
|  | Survival | 607(99.8) | 541 | 425(99.5) |  |  |
| Severe | Death | 4(2.1) | 4(2.3) | 0 |  | 0.037* |
|  | Survival | 185(97.8) | 171(97.7) | 235 |  |  |
| Critical | Death | 2(33.3) | 0 | 1(11.1) |  | 0.682* |
|  | Survival | 4(66.7) | 2 | 8(88.9) |  |  |

Fisher's exact probability

Note: There were 2210 patients in the Chinese medicine group in center 1, with 5639 days total treatment time. The mean number of days from onset to admission was 24.1 days (standard deviation 13) for 25889 patients. The mean time from onset to the start of taking Chinese medicine was 29.3 and 12 days. We investigated the onset to the time of taking Chinese medicine, 14 days, 14–28 days, 28–42 days and 42 days fatality rate, and the time distribution difference between groups was statistically significant (P< 0.05). We investigated the actual time of taking Chinese medicine, fatality at <7 days, 7–14 days and ≥14 days, and the differences among the groups with a severe clinical classification on admission was statistically significant (P<0.05), suggesting that the time from onset to taking traditional Chinese medicine may be related to the prognosis.

Table 3 The distribution of disease onset to admission days of patients with different disease severity at admission

| Type | Disease onset to admission days | | | P |
| --- | --- | --- | --- | --- |
| <14 days (n=969) | 14 days (n=1290) | ≥28 days (n=2188) |
| Mild+common (n=3340) | 718 (74.1) | 965 (74.8) | 1657 (75.7) | 0.178 |
| Severe (n=1022) | 233 (24.0) | 291 (22.6) | 498 (22.8) |
| Critical (n=85) | 18 (1.9) | 34 (2.6) | 33 (1.5) |
